# Supplementary material for: Serologic responses to the PfEMP1 DBL-CIDR head structure may be a better indicator of malaria exposure than those to the DBL-α tag
Source: Malar J. 2019 Aug 13;18:273. doi: 10.1186/s12936-019-2905-9 (PMC6692945; doi:10.1186/s12936-019-2905-9)
Supplement: Supplementary file 1 — Additional file 1. Sequences, classifications, and domains of the PfEMP1 antigens used to populate the custom protein microarray. [file 12936_2019_2905_MOESM1_ESM.xlsx]

## Sheet: Sheet 1
Antigen	3D7 protein	var group	Group	Amplicon sequence	First Domain	Second Domain
PF3D7_1100200_1	PF3D7_1100200	Group A	PfEMP1 - Extracellular - non-CD36-binding	TGTGATCTTGATTTTTGGTTTCATACGAATGTTTGGAGGGACAAAGCATATGAAAGAGATCCTTGTTATGGCAGACAAGCAAAAAATAATTACAATTTGGAAGGAGCAGTATGTACGAATAGTAAAATAAAAGGTAATGAAAACAAGATAAATGACATTGGAGCGTGTGCCCCATATAGAAGACGAAATATATGCGATTATAATTTAGAACATCTAAATGAAAGAAATGTTTTAAATACTCATGATTTATTGGGAAATGTGTTAGTTATGGCAAAACGTGAAGGTGAATCTATTGTTGAGAAACATCCAAATAGAGGATCTTCAGAAGTATGTATTGCCCTTGCAAGAAGTTTTGCAGATATAGGAGATATTTTAAGAGGAAAAGACATGTATGTCGGG…	DBLa1.5	CIDRg3
PF3D7_1100200_2	PF3D7_1100200	Group A	PfEMP1 - Extracellular - non-CD36-binding	TGTGACATAGTTGAAAAACACTTTAAAGATAAGCACGATAATACTGGTGCAATAGATCATTGTAATCCAAAAAAGGATTATCCTCCATGGAAAAACGACAAAAGTTTAGTGGATGAAGATGGTGTGTATATGCCTCCTAGAAGACAAAAATTATGTGTAATTAATTTAGAACATTTTAAAGAGAATACATCAGATGATTTGAGAGAAGCATTCATTAAATGCGCTGCCGCAGAAACTTATTTGTTATGGCAAAAATATAAAGAGGATAACAATGGTGGTGAAGATCTACAAAACCAATTAAAAAGTGGAAAAATTCCTGAAGATTTTAAACGTCAAATGTTCTACACATTTGGAGATTATAGAGATTTCTTATTTGGAACAGATATATCAAAATTAAAT…	DBLg12	DBLd5
PF3D7_1100200e1s3	PF3D7_1100200	Group A	PfEMP1 - Extracellular - non-CD36-binding	TCATGTGGTTATTTCTGTGGTTTAGATATATGTACACCCAACAAAACTACAGGTGATATACATGATAAACAAAATGCACCAATTAGAGTACTGTTTAAACGATGGATAGAAAATTTTTTAAAAGATCATAACAAAATTAAAGACAAAATTTCTTTATGTATAAATAATGAAAACAGAAATATATGTACAGATGTTTGCAGAAAAAATTGTGAATGTATAGATAAATGGATAGAGATGAAAATGAAAGAATGGAAAATAGTACGCGATCGTTACGTCAAACAATATAATGTTGCTGATTCAGTAGTTTACGAAGTGAGAAGATTTTTAGAGGGCTTGCAACCTCAAAATGACCTTGAAAAAGTTAAAGGAGATGTTAATGATTTACGTGATTTAGAGGAA…	#N/A	#N/A
PF3D7_1100200e2s1	PF3D7_1100200	Group A	PfEMP1 - Intracellular	AAAAAATCCAAATCTTCTGTTGACTTGTTGCGTGTACTGAATATCCCGAAAGGAGATTATGAAATGCCTACGTTGAAATCCAAAAATAGGTACATACCATATAGAAGTGGTTCATATAAAGGCAAAACATATATATATATGGAAGGAGATAGTGATAGTGGACACTACTACGAAGATACAACTGATATTACTTCATCCGAAAGTGAATATGAAGAATTGGATATTAATGAGATATATCCGTATCAGTCACCAAAATACAAAACATTGATTGAAGTGGTACTAGAACCATCCAAAAGTAATGGTAACACACCAAGTAAGGGTGATGGTAACACACTAGGTGATGATATGGTACCTACCACGAATACATTTACAGATGAGGAATGGAGTGAATTGAAACAT…	#N/A
PF3D7_1100200	PF3D7_1100200	Group A	DBLalpha tag Group A	GCAAGAAGTTTTGCAGATATAGGAGATATTTTAAGAGGAAAAGACATGTATGTCGGGTATGATGAAAAAGAAAAAAATCGAAGAAAACAATTAGAAAATAAGTTGAAAGATATTTTCGATAATATATATAAGGATTTGACGAAGAAGAAGGGGAGGAATGGGAAGAAGTCGGCGCTACAAGAACGCTACAATGATCCTAAAGGAGATTTTTTTCAATTACGAGAAGATTGGTGGGCGCTTAATAGAGAAGACGTATGGAAAGCATTAACATGTTCTGCGGATGACAGTGAAGATTATTTCATACAATCAGAAGGTGTTACAAAATCATTTACAAATCCTAAATGTGGCCATGGTGACAATGAGGTTCTTACAAATCTTGATTATGTCCCTCAATTTTTA…
PF3D7_1300300_1	PF3D7_1300300	Group A	PfEMP1 - Extracellular - non-CD36-binding	TGTTCACTTACATACAAATTTCATACTAATATAACAACTGATGGGGGGGATGGAAGGCATCCTTGTCATGGTAGGGAAAACAATCGTTTTTCTGAAAGTCAAGAATATGGATGTAGTAATGTATACATAAAAGGAAATGAAAATAACAGTAATGGTACAGCATGTGTACCACCAAGAAGAAGACATATATGTGATCAAAATTTAGAATTTTTAGATAATCCTCACACTGATGATACTGATGATTTGTTGGGAAATGTGTTAGTTACAGCAAAATACGAAGGTAATTATATTGTTAGTAATCATCCAGATAAAAACAGCAATGGAAATAAATCAGGAATATGTACTTCTCTTGCACGCAGTTTTGCAGATATAGGAGATATTGTAAGAGGAAGAGATATG…	DBLa1.6	CIDRd1
PF3D7_1300300_2	PF3D7_1300300	Group A	PfEMP1 - Extracellular - non-CD36-binding	AATCCGTGTGTAGATAAAAATGATTCTCAACCCACTAAAACTGTGAGTTATATCGCTAGACAAATGCATCGAAGGGCAAAAGCACAAATGACAAAAAATAGTGTTGTTGATGGTGATAATAAGTTGGAAGGCGATATATTTAAGGTTACATTTAGAAATGGCGGGGTCGGAAAAAACCTGAATGGAGATATTTGCAAGATTGACAAAACGTATTCCAATGACAGTCGTGGTACTCCTACAGATGGACCTTGTGAAGGCAAAGGCGATCGGTTTAAAATAGGAACGGACTGGCAAGGTGATAGTTTCGTAAACCCACAATACCGTGGGATTTATATGCCTCCTAGACGTCAACATTTTTGTACATCGAATTTAGAAAAATTAGATGTTAGTAGAGTCATA…	DBLb3	DBLg12
PF3D7_1300300_3	PF3D7_1300300	Group A	PfEMP1 - Extracellular - non-CD36-binding	TGTGAAATGGCAAAAACACTTTTGCACAACAACGATGGAACCATAAGAATAGGACAATGCAAACGTAAAGATGAAGGAAATGCAGAATATCCAAAATGGGATTGTAATTCTCAGATTCATACAACACATAATGGAGCATGTATGCCTCCTAGAAGACAAAAATTATGCGTATATTTTTTTGCAAATCCATCTCAAATAGGAAGTATAAATAAACAAGATAATTTAAGAAAAGCATTTATTATATCTGCAGCAGCAGAAACATTTCGTTCATGGCAGTATTATAAGAGTAAGAATGGTGGTGAAAACCTCCAAACTCAATTAAAAGATGGAACTATTCCTGACGATTTTAAACGTCAAATGTTCTATACATATGGAGATTATAGAGATTTTTTATTTGGA…	DBLg12	DBLd5
PF3D7_1300300_4	PF3D7_1300300	Group A	PfEMP1 - Extracellular - non-CD36-binding	TGCACCATCGTGGATGGCATCCTCAGCCCACAAAATTCGAGTTCGTACGCCGAAGGGTGTAAATGGAAATATGGGAAGATGTCACAAGGGGGTACGGAATGGGATTGTAGTAAAAAAAGTGGGGGTGAAGGTGGTAATGAGGACGGTGATGTTGTATGTATACCTCCAAGGAGAAGGAGATTATATGTAAAGAATTTACAGGATTTGACTGGTGAAGAATCACTAGTGGATTTACGAAAAGCTTTTATTAAGTGTGCTGCTATAGAAACATTTTTTGCTTGGCATGAATTTAAAAAAGAAAAAGAAAGAGAGGAAAAAGAAAAAAATGAACAAGATGTACAATATAAATCATCTGTCTTAGAAAATCTTCAAAAGCAGTTAAAAAATGGAGAAATAGAT…	DBLd5	CIDRb3
PF3D7_1300300_ATS	PF3D7_1300300	Group A	PfEMP1 - Intracellular	TCTACCATCATGTGGAGTGTAGGTATCGGTTTTGCGGCCATCAGTTACTTTTTACTAAAGAAAAAACCGAAATCACCTGTTGACCTCATACGTGTAATTGATATCCATAAAGGCGATTATGGAATACCTACATTGGAATCCAAAAATAGATATATCCCCTATGTGAGTGATACATACAAAGGCAAAACATATATATATATGGAAGGAGATACTAGTGGAGATGAAAAATATGGATTTATGTCTGATACTACTGATATAACTTCCTCCGAAAGTGAGTATGAAGAATTGGATATTAATGATATATATGTACCAGGTAGTCCTAAATATAAAACATTGATAGAAGTAGTATTGGAACCATCAAAAAGTAATGGTAACACACTAGGTGATGATATGGTACCT…	ATSA2
PF3D7_1300300	PF3D7_1300300	Group A	DBLalpha tag Group A	GCACGCAGTTTTGCAGATATAGGAGATATTGTAAGAGGAAGAGATATGTTTAAATCTAATGAAAAGGTAGAAATCGGTCTAAAAAAGGTTTTCGAGAAAATAAATAATGGATTGAAGAAAATAGGAATTAATGATTATAATGATATATCTGGAAATTATTATAAATTAAGGGAAGCTTGGTGGACGGCTAACCGCGATCAAGTATGGAAAGCCATAACATGTAGAGCCCCAAACGGGGCTAATTATTTTAGAAAAGGTTTAGATGGAAAAATAATTTTTTCAGATAATGGACCATGTGGTCGTAAGGAACTAATCGTTCCTACCTATTTAGATTATGTCCCTCAATTTTTAAGATGGTTAAATGAATGG
PF3D7_0100300_1	PF3D7_0100300	Group A / var3	PfEMP1 - Extracellular - non-CD36-binding	TGTAGTCTTGATCACAAATTCCATACTAATATAAATAATGGATATCCCCCCGCAAGAAATCCTTGCGATGGTAGAAATCAAGAACGTTTTTCAAACGATGGTGAATCAAAATGTGGTAGTGATAAAATAAGAGGTAATGAAAATAACAGTAATGCTGGAGCATGTGCACCATTCCGAAGACAAAATATGTGTGATAAAAATTTAGAATATTTGATCAATAAAAACACAGAAAATACTCATGACTTATTGGGAAATGTACTAGTTACAGCAAAATATGAAGGTGAATCAATTGTTAATAATCATCCAGATAAAGATATTAAGGGTAATAAATCAAGTATATGTACTTCTCTTGCACGAAGTTTTGCAGATATAGGAGATATTATTAGAGGAAAGGATATG…	DBLa1.3	DBLe8
PF3D7_0100300	PF3D7_0100300	Group A / var3	DBLalpha tag Group A	GCACGAAGTTTTGCAGATATAGGAGATATTATTAGAGGAAAGGATATGTTTAAACGTAATAAACATGATAATATAGAAAAGGGTCTAAGAGAAGTTTTTAAGAAAATATACGAGGGTTTAAAGAATAACGGGGCGAGAGAGCATTACAAAGAAGTCAAAAATGGAAATTACATAAAATTAAGGGAAGATTGGTGGACAGCGAACAGAGATCAAGTATGGAAAGCTATAACGTGTGAAGCGCCAGAAAATGCATATATTATAAAAAGAAGAATTGATGGTGGTGATATTGAGAATTTGATTTTGACACATCCAAAGTGTGGACATGATACTGATCCCCCTGTTGTTGATTATATCCCTCAACGCTTAAGATGGATGAGCGAATGG
PF3D7_0200100_1	PF3D7_0200100	Group B	PfEMP1 - Extracellular - CD36-binding	TGCAAACTTCAATATGATTATAATACTAATGTTACTCATGGTTTTGGTCAAGAGTATCCTTGTGAAACGGACATAGTAGAACGTTTTTCTGATACAGAAGGAGCACAATGTGATAAGAAAAAAATAAAAGATAATAGTGAAGGAGCTTGCGCTCCATATAGACGATTACATGTATGCGTTAGAAATTTGGAAAATATCAATGATTATAGTAAAATTAATAATAAACATAATTTATTGGTAGAAGTGTGTCTTGCAGCCAAATATGAAGGGGAATCAATAACAGGTCGTTATCCACAACATCAAGAAACTAATCCTGATACTAAATCTCAACTATGTACTGTATTAGCACGAAGTTTTGCAGATATAGGTGATATTATAAGAGGAAAAGATCTGTATCGT…	DBLa0.7	CIDRa2.2
PF3D7_0200100_2	PF3D7_0200100	Group B	PfEMP1 - Extracellular - CD36-binding	TGCGACACAGTGAAAACCGCACTCGCGGACACGGGCAGTCTCAATGCTGCATGTTCCCTCAAATATGTTACTGGTAAAAACTACGGCTGGCGGTGTATCGCACCTAGTGGTACCACTAGTGGAAAAGACGGTGCTATATGTGTGCCACCACGAACACAAGAATTATGCTTATATTATTTAAAAGAATTGAGTGACACAACACAAAAAGGTTTGAGAGAAGCATTTATTAAAACTGCAGCACAAGAAACTTACTTGTTATGGCAAAAATATAAAGAAGACAAACAGAACGAAACTGCATCAACAGAACTCGACATAGATGATCCACAAACGCAATTAAATGGTGGAGAAATCCCTGAAGATTTTAAACGTCAAATGTTCTATACGTTTGGAGATTATAGA…	DBLg11	ATSB1
PF3D7_0200100	PF3D7_0200100	DBLalpha tags	DBLalpha tags	GCACGAAGTTTTGCAGATATAGGTGATATTATAAGAGGAAAAGATCTGTATCGTGGTGGTAATACCAAAGAAAAAAAAAAAAGAAAAAAATTAGAAGAAAATTTAAAAACGATTTTCGGGCATATATATGATGAATTGAAGAATGGGAAGACGAATGGGGAGGAGGAGCTACAAAAACGCTACCGAGGTGATAAAGATAATGATTTTTATCAATTACGAGAAGATTGGTGGGACGCTAATCGAGAAACGGTATGGAAAGCTATCACATGCAACGCTGGAAGTTATCAATATTCTCAACCAACATGTGGTCGTGGAGAAATTCCATATGTGACGCTTAGTAAATGCCAATGTATTGCTGGAGAAGTTCCTACATATTTTGACTATGTCCCACAATATTTG…
PF3D7_0632500_1	PF3D7_0632500	Group B/A	PfEMP1 - Extracellular - CD36-binding	TGCAAACTTAATTATATATATGATACTAATGTTACCAGTGGTGGTGGTAAAGAGAATCCTTGTTACGGTAGACAAGGTGTTCGTTTTTCTGATACAAAAGGAGCAAAATGTTATTCTTATAAAATAGAGGATAATGATAGTAGCATTGGTTTTTGTGCTCCTTATAGAAGGTTACATCTGTGTGTTCAAAATCTGGAACAGATAAAGCCTGATCAAATTACAAGTACTCATAATTTATTGGTTGATGTATTACTTGCAGCAAAATATGAAGGACAATCAATAACACAAGATTATCCAAAATATCAAGCAACATATGATGATTCTCCTTCTAAAATGTGTACTATGTTGGCACGAAGTTTCGCAGATATAGGTGATATCGTTAGAGGAAAAGATCTATTT…	DBLa0.6	CIDRa3.2
PF3D7_0632500_2	PF3D7_0632500	Group B/A	PfEMP1 - Extracellular - CD36-binding	AATCCATGTGCTACTCCTAGTGGTAGTTATCCTTCGCTTGCCAACAAAGTGGCACAACTAATGCATCACAAGGCAAAGACACAATTGGCTATTCGTGCTGGTAGAAGTTTGTTGAGAGCCAATGCATCAAAAGGTGAATATAAACATGAAGGTAATCCAGATGACTTCAAGAAGGAAAAATTATGTGAAATAACTGCAAAGCATTCCAATGATAGTCGTCGTGACGGTGAACCGTGTAAAGGCAAAGATGGAAACAATGAGAGATTTAAAATAGGAACGGAATGGAAAATTGGAGAAAAAGTAGAAACGTCATACAAAGACGTCTTTTTACCTCCCCGACGACAACACATGTGTACGTCGAATTTAGAAAATTTAGATGTTGATAGTGTCACTGAAAAT…	DBLb5	DBLg13
PF3D7_0632500_3	PF3D7_0632500	Group B/A	PfEMP1 - Extracellular - CD36-binding	TGCGACATAGTAAAAGACCTTTTTGAAAATAAAGATGATAACAAATTTACTGAAGCTTGTTCAACAAAATATAAAAATGGAAAAGAAAAATATACACAATGGAAATGTATAAATGATAGTAGTAACACCACTAGGTCGTCCCCCCCCGCCCCCGTCGCTTCGTCGACGTTATCGACCTCGCCGGAAGCTGGCGCATCCGCGACATGCATTCCCCCACGACGACAACAAATGTATATACAACCGTTACAATCACTTAGTGGTAACGAGTCACAAGTGGAGTTACGACGTATATTTATTGAAATGGCGGCTATTGAAACATTTTTTCAGTGGCATAAATTTAAAAAAGAGAAAGTAAGAGAAATAAAAGAAAAAGATGAAATAGATGGAAAAATTTCATTA…	DBLd4	CIDRg1
PF3D7_0632500_4	PF3D7_0632500	Group B/A	PfEMP1 - Extracellular - CD36-binding	TCCGATATTTTGTGTGATGATAAGAAAGAACCGAAGTGTGGAAATTTTAGAACTCTTTTTAAAACTAGTACATCTAAAACTAAAACCAATTTGATAGGGTTGGAAGCGCACAATCATAGAGCAGGACGCTTTTACCCCAATGTGTATATTTCTCCTAGAGCACATCAATTGTATCTTGAACCATTAAAAGATTTAAAAGAAAATAATACAGATAAAAATGAACTTATTAAAGCATTCACAAAATGTGCCTATAATGAAGGAAAATGTTTATACGAGTACTATAGCAAAAATAAGGCTACGCTTGGAAAAAACGGTTCTGCATTATCGAATGATGAGGTAAAAACATATACCTTAGAAGCTATGGAAAGATCTTACGCAGATTATGGTACTATAGTTAAA…	DBLe2	DBLe7
PF3D7_0632500_5	PF3D7_0632500	Group B/A	PfEMP1 - Extracellular - CD36-binding	GATCTAGATAAATGTCCAAATAATATCAATAATAATAAAAATATATGTAATAAATATAAAAAACGACGAATATGTGGTGATTTAAAATATAGCAATTCTCTAGACCATTGGTTTGGAACAAATACGTTAATACCTCCTAGAAGAAGACATTTATGTCTTAGAAATATAATCATCAAAAAAAATTATAGAAAAGGAGATATTAGTAAATTCAAAGATGACCTTTTTTATGCTGCAGCCAGTGAAGCGAAATTTTTGTTTAACAATTATGAGAACAAAAATGAAAGTTTACAAGCAATAAAATACACTTTTGCTGATATTGGTGATATAATTAAAGGAAACGATATGATGGACGATATGACATACAAAAAAATTAAAGGTAAATTAGAAAAAGTACTTGAC…	DBLe7	DBLe3
PF3D7_0632500	PF3D7_0632500	Group B/A	DBLalpha tag Group B/A	GCACGAAGTTTCGCAGATATAGGTGATATCGTTAGAGGAAAAGATCTATTTCTTGGCACCAATGAAGAGAAAAAACCATTAGAAGAAAATTTGAAAGAAATTTTCAAGAAAATATATGAAAATTTGGGTATACAAGAAAAAAATCACTACAATGATACTCCAGATTATTATAAATTACGAGAAGATTGGTGGATTGCTAATCGTGACCAAGTATGGAAAGCTATTACATGCAACGCTGGGGGTTATTCATATTTTCGAAAAACATGTGGTGGTGATAATGAAAAAAATTCAACTCTTGCTAGTAACAAATGCCGCTGTAAGGACGAAAAGGGCGAACATGACACCGACCAGGTCCCCACATATTTTGACTATGTGCCACAGTATCTTCGCTGGTTCGAG…
PF3D7_0808700_1	PF3D7_0808700	Group B/C	PfEMP1 - Extracellular - CD36-binding	TGCCAACTTATAAAAGAAAAACGTGAGAACCTTATTGGTGATCGCGGTGAAAGGCATCCGTGCGGAAATGGAAGTGGAAAAGGAGAAGATGTAAACCGGTTTTCTAAAGAACGTGTCGATGAATATGATAACAAAAAAATGAAATGTAGTTATGGTAGTAATGGTAAAAGTGAAGGTGCATGTGCTCCTTTCAGACGATTACATGTATGTGATAAAAATATCCAACAGATAAAAACTGAAAATATAACAACACATAATTTATTATTAGATGTGTGTCTTGCAGCAAAGTATGAAGGAGAGTCCTTAAAAGGTTATCATGAGCAATATGAAGTACAATATCCTTCTTCTGGTTCTACAATGTGTACTGAGTTGGCACGAAGTTTTGCAGATATAGGAGAT…	DBLa0.2	CIDRa3.1
PF3D7_0808700_2	PF3D7_0808700	Group B/C	PfEMP1 - Extracellular - CD36-binding	TGTGACATAGTGGACAAACTATTTAAAGACGACAATACTCTTACAAATGCCTGTCCAACCAAGTATGAAAAGGGCCGAGAAAAATTCCCCAATTGGAAATGTATACCAAGTGGTGACAAAACAGACACTCGTGAACGTGCTGGCCGTTCCAGACGTGACACTAGTGGTGAGAATACTACCACTGGTAGTAGTGGTGACACTAATGGTAGTGTTTGTGTGCCATCCAGGAGGCGAAAACTATACATACAAAAACTACACGATTGGGCGGAAAAACAGGTGGGTACCACACAGGTAGATGGTAAGGCAGCACAAGGTGACGCCGCGTCGAAAGACCCCAAAGTGGAACTACGAAATGCTTTTATCCAGTCTGCGGCAGTTGAAACTTTTTTCTTATGGCAT…	DBLd1	CIDRb1
PF3D7_0808700	PF3D7_0808700	DBLalpha tags	DBLalpha tags	GCACGAAGTTTTGCAGATATAGGAGATATTGTCAGAGGAAGAGATTTGTATGGAGGTAGTAAAAAAGAAAAAGAAAAAAGAAAACAATTAGATGATAAGTTGAAAAAAATTTTCGAAAACATTAAGAAAGAGAATAATGAAAAACTTAAATCCCTTACAGATGACCAAATTAGGGAATATTGGTGGACTGCAAATCGAGAAACAGTATGGAAAGCTATTACTTGTGACGAAGAGAACAAGCTAGGGGGTTATTTATATTTTCGAGGAACATGTGGTGATAATGAAAAAAGTGTAACTCAGGCTAGAGACAAATGCCGCTGTAAGAAGAAAGACAACACCCCCGACGACCAGGTCCCCACATATTTCGATTATGTGCCACAGTATCTTCGCTGGTTCGAG…
PF3D7_0712000_1	PF3D7_0712000	Group C	PfEMP1 - Extracellular - CD36-binding	TGCAAACTTGAAAGTGAATATACTGAACTTATTAGTGGTAGTCTTGCTTCTGGTGGTGCTGCTCGCGGTCATCCGTGCGGAAACGTAAGTGGAAATGATGGAACAGGAAATGACGATTTAAAACGTTTTTCTAAAGAACGTGTCTCTAAATATGATGAGAAAAAAATAAGAGGTAGTAATGATGGAGCCTGTCCTCCATATAGAAGATTATCTCTATGCAACAAAAATCTGGAAAATATAAAGACTAATATAATTGATAACAAGCATGATTTGTTGGTAGATGTGTGTATGGCAGCAAAATATGAAGGGGAATCAATAAAAGCACATTATCCTAAATATGATGCAGAATATTCTTCTGGTTCTGGTTCTGATTTTCCAATGTGTACTATGTTGGCACGC…	DBLa0.17	CIDRa3.1
PF3D7_0712000_2	PF3D7_0712000	Group C	PfEMP1 - Extracellular - CD36-binding	TGTGAAATAGTGGACAAACTATTTAATAATCCAGACAATTTTAAAGAAGTCGCGTGCCAACAAAAATATGCCAAAAACAACTCACGTTTAGGTTGGAAGTGCATAGCAAGTGACACAAAAAGTGTTGCCACTGTCAAAAGTGATGCTAGTGGTAGTATTTGTGTGCCACCAAGGAGGCGACGACTATACGTGGGTCATTTACAGAAGTGGGCGGAAAAATACAACAAGGTGGCACCACAGGTGGGTGGTGGTAACACAAAGGCGGGTGAGTCATCACAATCAAGTAGTGGTAGTGAAACACCCTCACAACCAGACCCCAAAGTGGAACTACGTGATGCATTTGTTGAGTCTGCGGCAATAGAGACTTTTTTCTTATGGGATAGATATAAGAAAATAAAA…	DBLd1	CIDRg7
PF3D7_0712000	PF3D7_0712000	DBLalpha tags	DBLalpha tags	GCACGCAGTTTTGCAGATATAGGAGATATTGTAAGAGGAAAAGATCTATATAGTGGTAATAAGAAAAAGGAAAAATTAGAACAGAATTTACAAAAAATTTTCAAAGAAATATATGACAAATTGAATGGCGCAAAAGACCACTACCAAAAGGACGGTGATAAATTTTTTCAATTAAGGGAAGATTGGTGGACAGCGAATAGGCACACCGTGTGGAAAGCATTAACATGCAAGGCGGAAGGTGCATATTTTCGACCAACGTGCAGTGATGGAAATAGTCAGTCTCAAGCTACAAAGCAATGCCGCTGTAACGACAAGCCAAATGCCGGCAAGCCAAAGGCTGGCAACGGCGACGTAAATATTGTCCCCACCTATTTCGATTATGTGCCGCAGTATATTCGC…
PF3D7_1240600_1	PF3D7_1240600	Group C	PfEMP1 - Extracellular - CD36-binding	TGCAAACTTATAAAAGAAAAACATGAGAACCTTATTGGTGCTCGCGGTGATCCGTGCGGAAAGGATGGAACAGGAAAAGAAGACGATTCAAAACGTTTTTCTAAAGAAAGTGGCGCTGAATGTGATGAGAAAAAAATAAAAGATAATAAAAGTAAAGGAGGTAATAATGAAGGAGCGTGTGCTCCATATAGACGATTATCTCTATGTAACAAAAATATGGAAAAAATGGGCAGAACGTCGACAACGAAGCATGATTTGTTGTTAGATGTGTGTATGGCAGCAAATTACGAGGCAGAGTCATTAATACCTTATCATGACCAATATGAAGCAACATATAAGGATTATGGTTCTACAATGTGTACTATGTTGGCACGAAGTTTTGCAGACATAGGTGATATT…	DBLa0.20	CIDRa3.1
PF3D7_1240600_2	PF3D7_1240600	Group C	PfEMP1 - Extracellular - CD36-binding	TGCGACACAGTGGACAAACTATTTAAAGACACCACTGCTCTACAGGATGCATGTAATTTAAAATATGTGAAAGGCAAAAACTACGGTTGGAGGTGTGTGGCACCAAGTCATACCACAAGTGAAACCACTGGAAAAAGTGAATCCGCCACATCTAGTAGTGGTGCCACCACCGCTCCGGCGCCTTCATTGACCTCGCCGCAAGCTACCGCATCCGCCAACTCGGCCAATTCCGTCTCCTCCGCGGTGTGTATCCCTCCCAGGAGACGACGATTATATGTGGGGAAATTGGAACAGTGGGCGAGTGGCGGTAACACACAGGGGGGTGGTGGTAACACACAGGTGACACCACAAGCGGGTGGTAGTGAGGCACAGACACAACCACAAGGCAAGGACGCCGCG…	DBLd1	CIDRb1
PF3D7_1240600_ATS	PF3D7_1240600	non-A ATS	PfEMP1 - Intracellular	TCCACCCTCGCCTGGAGCGTTGGCATCGGTTTTGCTGCATTCACTTATTTTTATCTAAAGAAAAAAACCAAATCATCTGTTGGAAATTTATTCCAAATACTGCAAATACCCAAAGGTGATTATGATATACCTACATTGAAATCAACCAATCGTTATATTCCTTATGCAAGTGATAGACATAAAGGTAAAACATATATTTATATGGAAGGAGATACTAGTGGAGATGAAGATAAATATGCATTTATGTCTGATACTACTGATGTAACTTCCTCAGAAAGTGAGTATGAAGAATTGGATATAAATGATATATATGTACCAGGTAGTCCTAAATATAAAACATTGATAGAAGTAGTACTGGAACCATCAAAAAGAGATACACAAAATGATATGCCTAGTGAT…	ATSB23
PF3D7_1240600	PF3D7_1240600	DBLalpha tags	DBLalpha tags	GCACGAAGTTTTGCAGACATAGGTGATATTATAAGAGGAAGAGATCTATACAGTGGTAATAAGGTGAAAAAAAAAAAATTAGATGATAGTTTGAAAACAATTTTCGGGAAAATATATGAAGGATTGACAGGTGGTGTAAAAGAACGCTACACAAATGACGGTGGAGATTTCTTTCAATTACGAGAAGATTGGTGGACTGCGAATCGAGAAACAGTATGGAAAGCCATGACATGTAGCGAGCACCTAAAAAATTCTGCATATTTTCGTGTAACATGCAGTGATAAACAAGGTGAATCTATAGCTAATCACAAATGTCGATGTCCCATGACAAGTGATGGCAAGCCCAACGACCAAGTCCCCACATATTTTGACTATGTGCCGCAGTATCTTCGGTGGTTC…
PF3D7_0617400_1	PF3D7_0617400	Group C	PfEMP1 - Extracellular - CD36-binding	ATCCAACTTGAATATGAATATCACACTAACGTTACCGGTGGTTTTGATAAAAATAATCCTTGCGCAAATAGGTTGGACGTCCGATTTTCCGATATATATGGAGGTCAATGTACTGATAATAAAATAAATGGAAATGATGATGAAACTGGTGGAACGTGTGCTCCATTAAGGAGGTTATTTCTATGTGATCAGCATTTGTCGCACATGAAGGAAGGTAATATTAATAACACAGATAATTTATTATTAGAGGTGTCTCTTGCAGCAAAATATGAAGGAGATTCAATAATTAATAACTATCCTGATAACCGTGACAAAAAAGAAGGAATTTGTACAGCATTGGCACGAAGTTTTGCTGATATAGGTGACATTATCAGAGGAAAAGATCTGTTTCTTGGTTAT…	DBLa0.21	CIDRa2.1
PF3D7_0617400_2	PF3D7_0617400	Group C	PfEMP1 - Extracellular - CD36-binding	AACCCGTGTGCTGTAGGGAAAAAACTCACTAAAACTGTGAAACAAATCGCTAGACAGATGCATCAAGCGGCAAAGAAACAATTGGGTAGTAGTAGTAGTAGGGCATTGAAGGCTCATGCACATCTAGGAACATATAAACATACCAATAAACGCGATGATTTCAAAACAATATGTAAAATAACGAAGGATCATTCCAATGCTACCCATAACTATCCGCAAGGACCATGTCATGGAAAAAATAACGATAAATCTATGTTTAAGACAGAAGAAGGTTGGAAACCTGGGAACCAGATAAATATGAACGACGAATACGCCTTTATGCCTCCTCGACGTCAACATTTTTGTACATCGAATTTAGAATATTTAGAAACGGCTGACAGAACACTTAATGGTATTGGT…	DBLb4	DBLd1
PF3D7_0617400_3	PF3D7_0617400	Group C	PfEMP1 - Extracellular - CD36-binding	TGCGAAATAGTGGACAAACTATTTGAGGACACCACTACACCTCACGCAGCTTGCCAACAAAAGTATATAAATGGCCACGAAAAATTCCCCAATTGGAAATGTGTCACACCAAGTGGTGAAAAAAGTGGTGATAAGGGTGCCATATGTGTGCCACCCAGGAGGCGACGACTATACATACACGATTTACAATCACTAGACGAGAAGCCGAGCGATACCGCGCTACGTGATTGGTTTGTGAAAAGTGCCGCGGTTGAGACGTTTTTCCTATGGCATAGATACAAAAAACAAAAGGAAAAGAAACCACAGGAAGGGTCACTACTTTCCGGGTCAACACTACTTAGCCAGTTCAGCATAGACCTCGGTGATGAGGAACAGCCCCCCGAAAAACAATTGGCTGGT…	DBLd1	CIDRb1
PF3D7_0617400	PF3D7_0617400	Group C	DBLalpha tag Group C	GCACGAAGTTTTGCTGATATAGGTGACATTATCAGAGGAAAAGATCTGTTTCTTGGTTATACCAAAAAAGATGAAAAAGAAAAAGAAAAAGTACAGAAAAATTTAAAAAGAATATTCAATGAAATATATAAAAAAATGCAAGATCCTGCAAAATCTCATTATAGTGGTGATTCTTCAGATTTTTATAAACTAAGAGAAGATTGGTGGGCACTTAATAGAAAAGAGGTATGGAAAGCTATCACATGTAAAGCAAAAAATGATGCTGAATATTTTAGAAAAAAAGATTCTGATGGAAAACATTGCTCTGTTCAAAATTGCAAATGCGTTGATGGAGATCCTCCTACAAATCTAGACTACGTTCCTCAACATTTACGTTGGTTTGATGAATGGAGC
